# Supplementary material
Source: publisher figshare collection journal article supplement (https://rs.figshare.com/ndownloader/files/17890622)

Supplementary Figure 12. Diversification of Coraciiformes through time. A) Phylorate plot with an inferred core rate shift in *Todiramphus*; B) the six most credible sets of shift configurations (CSS) and their frequencies; C) clade-specific rates through time and the mean evolutionary rate ( $\lambda$ ) are shown for (a) all of Coraciiformes, (b) all *Todiramphus*, (c) all of *Todiramphus* excluding *T. nigrocyaneus*, *T. winchelli*, and *T. funebris*, which represents the branch with the inferred core rate shift, and (d) the background rate of Coraciiformes excluding *Todiramphus* kingfishers. Colours represent the mean of the marginal posterior density of speciation rates along each branch. Circles along branches indicate inferred core rate shifts.

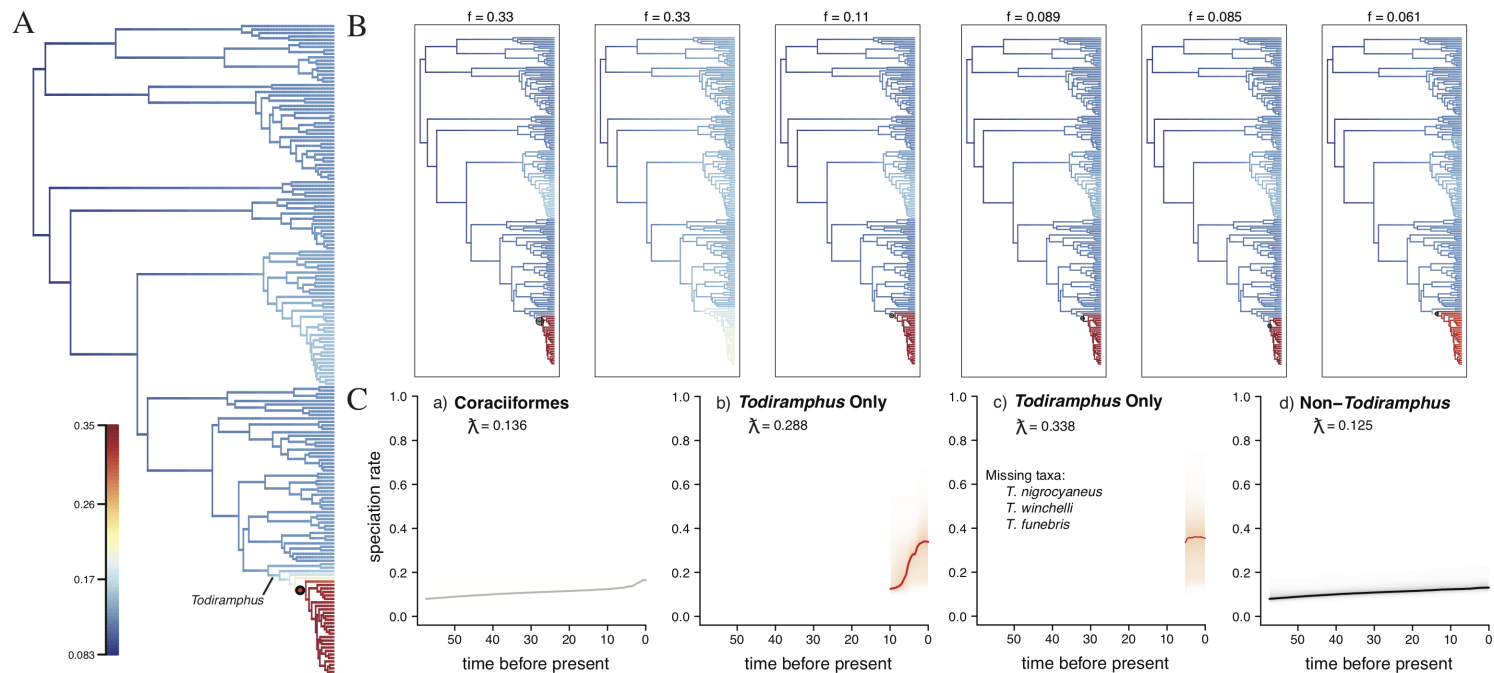

Supplement: Supplementary file 1 [file 17890622]
